# Supplementary material for: Effect of Epirubicin Plus Paclitaxel vs Epirubicin and Cyclophosphamide Followed by Paclitaxel on Disease-Free Survival Among Patients With Operable ERBB2-Negative and Lymph Node–Positive Breast Cancer: A Randomized Clinical Trial
Source: PubMed Central journal article supplement (PMC9958529; doi:10.1001/jamanetworkopen.2023.0122), 2023-02-24
Supplement: jamanetwopen-e230122-s001.pdf [file jamanetwopen-e230122-s001.pdf]

## Supplement 1: Trial Protocol

1  
2  
3  
4  
5  
6  
7  
8  
9  
10  
11

### List of Contents:

1. Inclusion Criteria
2. Exclusion Criteria
3. Dose and schedule
4. Dose modifications
5. Endpoints
6. Sample Calculation
7. Pathologic evaluation method
8. Supplementary References

12 **1. Inclusion Criteria:**

- 13 • Written informed consent
- 14 • Female patients, age at diagnosis > 18 years
- 15 • Karnofsky ≥ 70
- 16 • Histological confirmed unilateral primary invasive carcinoma of the breast with
- 17 node-positive (pN +) tumors
- 18 • Human epidermal growth factor receptor 2 (HER2) negative judged by two
- 19 pathologists according to updated guidelines of the American Society of
- 20 Clinical Oncology/College of American Pathologists (ASCO/CAP) [1,2]
- 21 • Hormone receptor positive
- 22 • No evidence for distant metastasis (M0) after conventional staging
- 23 • The patient must be accessible for treatment and follow-up
- 24 • Negative pregnancy test (urine or serum) within 7 days prior to randomization
- 25 in premenopausal patients
- 26 • Adequate organ and bone marrow function as evidenced by
- 27 1. Leucocytes  $\geq 4 \times 10^9/L$
- 28 2. Platelets  $\geq 100 \times 10^9/L$
- 29 3. Hemoglobin  $\geq 9$  g/dL
- 30 4. Total bilirubin  $\leq 1.5$  UNL
- 31 5. Aspartate transaminase (AST) and alanine transaminase (ALT)  $\leq 2.5$  UNL
- 32 6. Creatinine  $< 175$  mmol/L (2 mg/dL)
- 33 • Left ventricular ejection fraction (LVEF) > 50%

34

35 **2. Exclusion Criteria**

- 36 • Pregnant, or breast feeding, or women of childbearing age who cannot  
37 practice effective contraceptives
- 38 • Has previous history of additional malignancy, with the exception of  
39 adequately treated basal cell carcinoma and cervical carcinoma in situ
- 40 • Has received neoadjuvant therapy (include chemotherapy, targeted therapy,  
41 radiotherapy or endocrine therapy)
- 42 • Has metastatic (Stage 4) breast cancer
- 43 • Has any >T4 lesion (UICC1987) (with skin involvement, mass adhesion and  
44 fixation, and inflammatory breast cancer)
- 45 • Patients participating in other clinical trials at the same time
- 46 • Has severe organ dysfunction (cardiopulmonary liver and kidney) insufficiency,  
47 LVEF <50% (cardiac ultrasound); severe cardio cerebral vascular disease  
48 within the 6 months previous of randomization (such as unstable angina,  
49 chronic heart failure, uncontrolled hypertension with blood pressure  
50 >150/90mmHg, myocardial infarction, or cerebral blood vessel); diabetic  
51 patients with poor blood glucose control; patients with severe hypertension
- 52 • Has known allergy to taxanes and excipients
- 53 • Has severe or uncontrolled infection
- 54 • Inability to comply with study and follow-up procedure
- 55 • Any other finding giving reasonable suspicion of a disease or condition that  
56 contraindicates the treatment

57

58 **3. Dose and schedule:**

59 **Arm A:** epirubicin (75 mg/m<sup>2</sup>) and paclitaxel (175 mg/m<sup>2</sup>) every 3 weeks for 6 cycles  
60 (EP)

61 **Arm B:** epirubicin 90 mg/m<sup>2</sup> and cyclophosphamide 600 mg/m<sup>2</sup> every 3 weeks for 4  
62 cycles followed by paclitaxel 175 mg/m<sup>2</sup> every 3 weeks for 4 cycles (EC-P)

63 Upon completion of treatment, patients underwent follow up surveillance and  
64 were scheduled to be seen every 3 months for the first two years and every 6 months  
65 after that for 10 years.

66 Chemotherapy was administered before radiation therapy if radiation was  
67 indicated. Radiotherapy was completed by patients who received breast conservation  
68 or with  $\geq 4$  involved axillary lymph nodes or those with 1-3 involved axillary lymph  
69 nodes along with other high-risk factors. On completion of chemotherapy and/or  
70 radiotherapy, endocrinotherapy (the regimen was decided by the physicians) was  
71 administered to patients for 5 years.

72

73

---

74 **4. Dose modifications:**

75 **4.1 Treatment interrupted or aborted**

76 In the following scenario, patients should discontinue their allocated treatment:

- 77 • Medical conditions that are harmful to patients' health judged by investigators
- 78 • Unacceptable toxicity, for example: more than twice dose delay and/or dose  
79 reduction due to hematologic toxicity reduction twice; grade 3 or 4  
80 non-hematologic toxicity occurs for the third time
- 81 • Patients still cannot receive the designated treatment for 42 days after the last  
82 administration of previous cycle
- 83 • Patient requirements
- 84 • Relapse of the disease
- 85 • Poor compliance

86 If a patient withdraws from the study treatment, every effort should be made to  
87 keep up-to-date on the annual survival status, to get the latest survival status for at  
88 least 5 years after the enrollment, and to make effective efforts to determine the  
89 reason why the patient cannot follow up or withdraw from the trial. If the patient stops  
90 the treatment or follow-up, detailed cause must be recorded and the patient who  
91 withdrew from the trial cannot be replaced.

92 **4.2 Dose reduction**

93 Dose reduction is allowed according to the severest level of overall toxicity. Drug  
94 reduction due to hematological or non-hematologic toxic reactions is permanent.

- 95 • Hematological toxicity

96 Dose reductions caused by hematological toxicity should be based on the  
97 lowest levels of neutrophils and platelet counts tested after the previous cycle,  
98 following the table below:

99

100 Table 1. Dose adjustment during the cycle based on the minimum count of  
 101 neutrophils caused by the previous cycle **Error! Bookmark not defined.**

| <b>Neutrophils<br/>(<math>\times 10^9/L</math>)</b> | <b>Dose of<br/>paclitaxel</b> | <b>Dose of<br/>epirubicin</b> | <b>Dose of<br/>cyclophosphamide</b> |
|-----------------------------------------------------|-------------------------------|-------------------------------|-------------------------------------|
| > 1.5                                               | 100%                          | 100%                          | 100%                                |
| 1.0-1.49                                            | 75%                           | 75%                           | 75%                                 |
| < 1.0                                               | Dose delay                    | Dose delay                    | Dose delay                          |

102 • Non-hematological toxicity

103 Dose reduction due to non-hematologic toxicity will be implemented following the  
 104 tables below:

105

106 Table 2. Dose adjustment during the cycle based on the non-hematological toxicity

| <b>Toxicity</b>                                                       | <b>Grade</b> | <b>Dose of<br/>paclitaxel</b> | <b>Dose of epirubicin<br/>/cyclophosphamide</b> |
|-----------------------------------------------------------------------|--------------|-------------------------------|-------------------------------------------------|
| <b>Liver</b>                                                          | 0-2          | 100%                          | 100%                                            |
|                                                                       | 3            | 50%                           | 50%                                             |
|                                                                       | 4            | Dose delay                    | Dose delay                                      |
| <b>Myalgia or peripheral<br/>neuropathy</b>                           | 0-1          | 100%                          | 100%                                            |
|                                                                       | 2            | 50%                           | 50%                                             |
|                                                                       | 3/4          | Dose delay                    | Dose delay                                      |
| <b>Mucositis</b>                                                      | 0-2          | 100%                          | 100%                                            |
|                                                                       | 3            | 50%                           | 50%                                             |
|                                                                       | 4            | Dose delay                    | Dose delay                                      |
| <b>Bradycardia with<br/>symptoms</b>                                  | Any          | Dose delay                    | Dose delay                                      |
| <b>Other toxicity (except<br/>nausea, vomiting and<br/>hair loss)</b> | 0-2          | 100%                          | 100%                                            |
|                                                                       | 3            | 50%                           | 50%                                             |
|                                                                       | 4            | Dose delay                    | Dose delay                                      |

107

108 **5. Endpoints**

109       The primary endpoint was DFS, defined as the time from randomization to  
110 occurrence of a new event including local recurrence, regional relapse, distant  
111 metastasis, or death from any cause (excluding second non-breast invasion). Patients  
112 alive without any predefined event were censored at the time of the last follow-up.  
113 Secondary endpoints included: (1) OS, defined as the time from randomization to  
114 death from any cause; (2) DFS-s, defined as the time from randomization to  
115 occurrence of a new event including local recurrence, regional relapse, distant  
116 metastasis, and second non-breast invasive cancer; and (3) safety, which was  
117 assessed throughout the study treatment according to the Common Terminology  
118 Criteria for Adverse Events (CTCAE), version 4.0.

119

120

121 **6. Sample Calculation:**

122 This trial was designed to evaluate the non-inferiority of EP versus EC-P. The test  
123 was designed with 80% power at the one-sided alpha of 0.05. The trial assumed a 5-  
124 year DFS of 83% for EC-P. [3,4] Non-inferiority was defined as the 5-year DFS of EP  
125 being not worse than an absolute value of 5% below EC-P, with a limiting hazard ratio  
126 (HR) of 1.30. Under these assumptions, the sample size was approximate 800  
127 patients, with a ratio of 1:1 in each group. HRs were obtained using the Cox  
128 proportional hazards model. Non-inferior P values were calculated according to  
129 previous study. [5]

130

131



132 **7. Pathologic evaluation method:**

133 Primary surgically removed tumour tissues were sent to the Department of Pathology  
134 in National Cancer Center/National Clinical Research Center for Cancer/Cancer  
135 Hospital, Chinese Academy of Medical Sciences and Peking Union Medical College  
136 for slide review, immunohistochemistry (IHC) staining, and fluorescence *in situ*  
137 hybridization (FISH) analysis. Two experienced breast pathologists assessed  
138 histology and central grade and were both blinded to the clinical data and to Ki67  
139 expression. Slides were stained for estrogen receptor (ER) (rabbit [SP1];  
140 Neomarkers, Fremont, CA), progesterone receptor (PR) (mouse monoclonal  
141 PgR636; DAKO, Glostrup, Denmark), and Ki67 (clone 30-9 rabbit monoclonal;  
142 Ventana, Tucson, AZ) using standard protocols. Tumours were classified as ER or  
143 PR positive if IHC was present in  $\geq 1\%$  of tumour nuclei. Ki67 was evaluated in at least  
144 100 tumour cells within the high-density area semi-quantitatively (in 5% increments)  
145 and quantitatively (in 1% increments). Additionally, the patients with HER2  
146 expression status (IHC, score =2) were subjected to fluorescence in situ hybridization  
147 (FISH) screening for HER2 gene amplification. The HER2 negative subgroup was  
148 defined as FISH negative with IHC score <3 or IHC score <2.

149

150

151 **8. Supplementary References:**

- 152 1. Wolff AC, Hammond ME, Schwartz JN, et al. American Society of Clinical  
153 Oncology/College of American Pathologists guideline recommendations for human  
154 epidermal growth factor receptor 2 testing in breast cancer. *J Clin Oncol.*  
155 2007;25(1):118-145.
- 156 2. Wolff AC, Hammond ME, Hicks DG, et al. Recommendations for human epidermal  
157 growth factor receptor 2 testing in breast cancer: American Society of Clinical  
158 Oncology/College of American Pathologists clinical practice guideline update. *J Clin*  
159 *Oncol.* 2013;31(31):3997-4013.
- 160 3. Swain SM, Tang G, Geyer CE Jr, et al. Definitive results of a phase III adjuvant trial  
161 comparing three chemotherapy regimens in women with operable, node-positive  
162 breast cancer: the NSABP B-38 trial. *J Clin Oncol* 2013;31:3197-204.
- 163 4. Swain SM, Jeong JH, Geyer CE Jr, et al. Longer therapy, iatrogenic amenorrhea, and  
164 survival in early breast cancer. *N Engl J Med* 2010;362:2053-65.
- 165 5. Tunes da Silva G, Logan BR, Klein JP. Methods for equivalence and noninferiority  
166 testing. *Biol Blood Marrow Transplant* 2009;15:120-7.
- 167
