# Supplementary material for: Effect of Epirubicin Plus Paclitaxel vs Epirubicin and Cyclophosphamide Followed by Paclitaxel on Disease-Free Survival Among Patients With Operable ERBB2-Negative and Lymph Node–Positive Breast Cancer: A Randomized Clinical Trial
Source: PubMed Central journal article supplement (PMC9958529; doi:10.1001/jamanetworkopen.2023.0122), 2023-02-24
Supplement: jamanetwopen-e230122-s002.pdf [file jamanetwopen-e230122-s002.pdf]

## Supplementary Online Content

Yuan P, Kang Y, Ma F, et al. Effect of epirubicin plus paclitaxel vs epirubicin and cyclophosphamide followed by paclitaxel on disease-free survival among patients with operable *ERBB2*-negative and lymph node–positive breast cancer: a randomized clinical trial. *JAMA Netw Open*. 2023;6(2):e230122. doi:10.1001/jamanetworkopen.2023.0122

**eFigure 1.** Kaplan-Meier Curves of Distant Disease-Free Survival (DDFS) in All Patients (A), Patients With Luminal A Cancer (B), and Patients With Luminal B Cancer (C)

**eFigure 2.** Kaplan-Meier Curves of Disease-Free Survival Including Second Nonbreast Invasive Cancer (DFS-s) in All Patients (A), Patients With Luminal A Cancer (B), and Patients With Luminal B Cancer (C)

**eTable 1.** The Comparison of Disease-Free Survival Between the 2 Groups

**eTable 2.** Subgroup Analysis

**eTable 3.** The Comparison of Chemical Menopause Events Between the 2 Groups

This supplementary material has been provided by the authors to give readers additional information about their work.

**eFigure 1.** Kaplan-Meier Curves of Distant Disease-Free Survival (DDFS) in All Patients (A), Patients With Luminal A Cancer (B), and Patients With Luminal B Cancer (C)

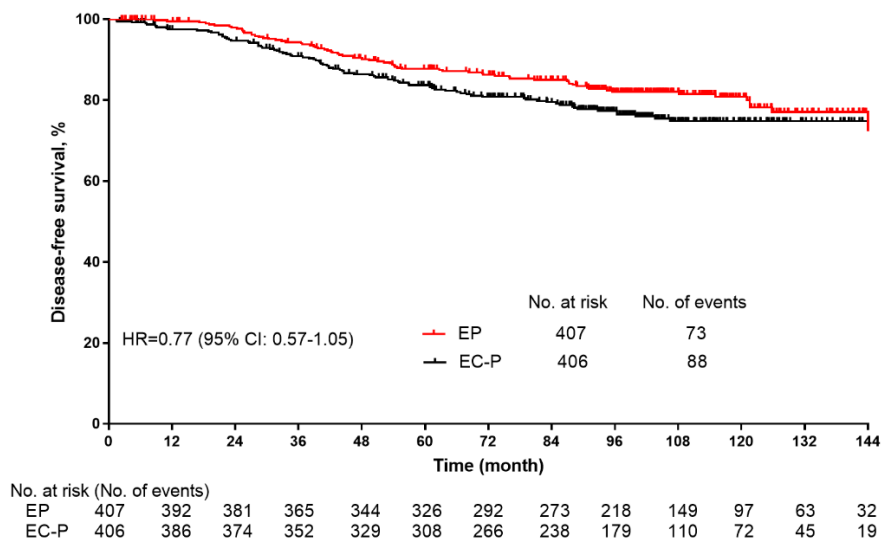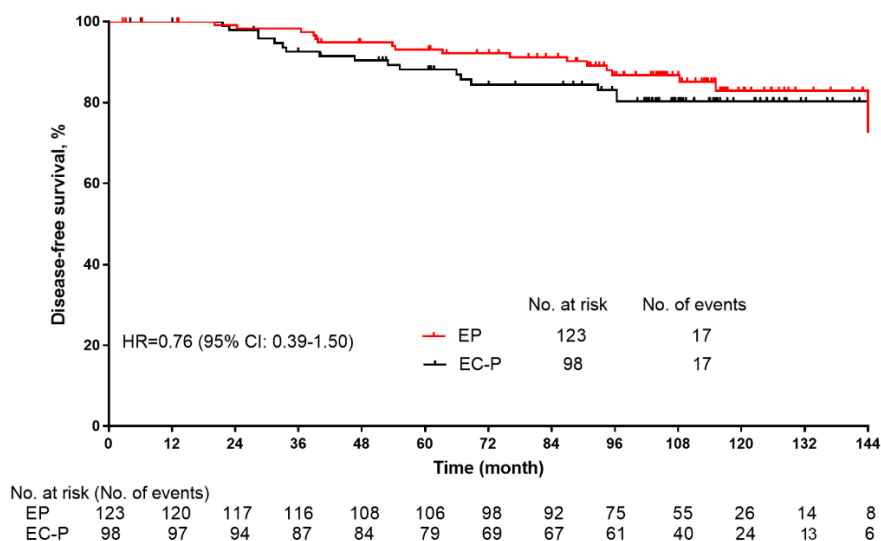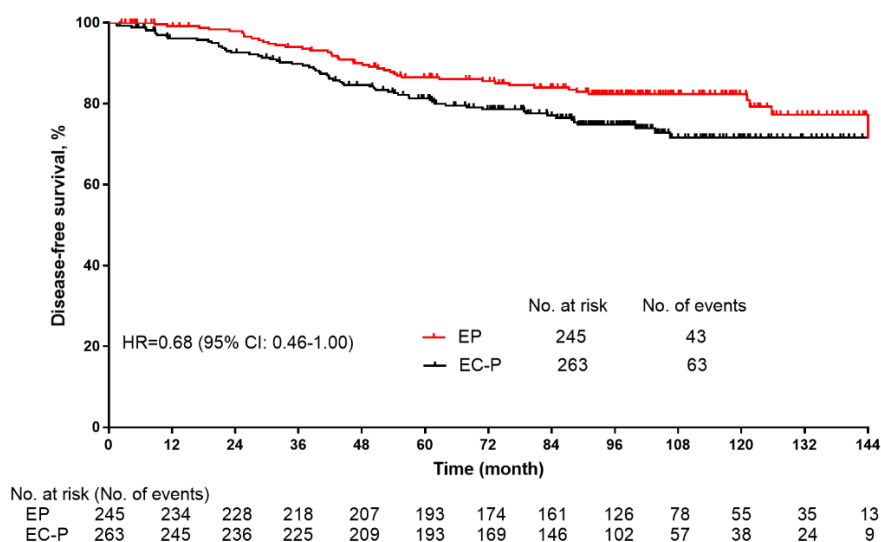

**eFigure 2.** Kaplan-Meier Curves of Disease-Free Survival Including Second Nonbreast Invasive Cancer (DFS-s) in All Patients (A), Patients With Luminal A Cancer (B), and Patients With Luminal B Cancer (C)

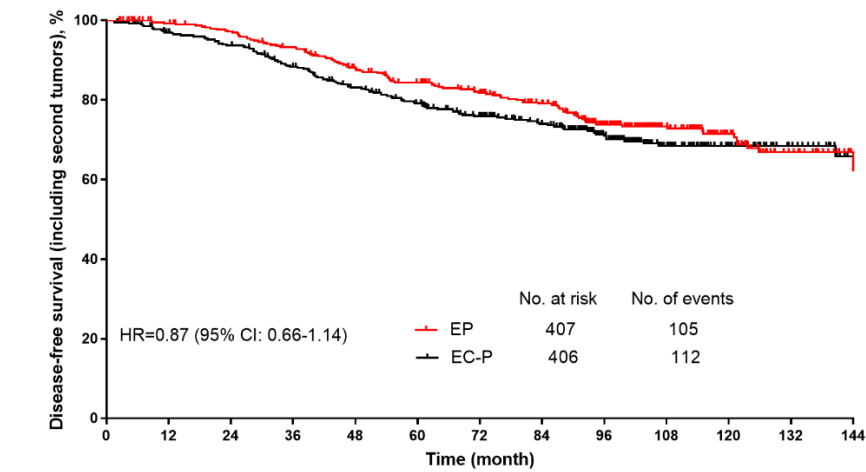

| No. at risk (No. of events) | 0   | 12  | 24  | 36  | 48  | 60  | 72  | 84  | 96  | 108 | 120 | 132 | 144 |
|-----------------------------|-----|-----|-----|-----|-----|-----|-----|-----|-----|-----|-----|-----|-----|
| EP                          | 407 | 391 | 379 | 362 | 336 | 316 | 278 | 254 | 198 | 132 | 87  | 56  | 28  |
| EC-P                        | 406 | 384 | 370 | 343 | 318 | 295 | 253 | 222 | 167 | 105 | 68  | 42  | 18  |

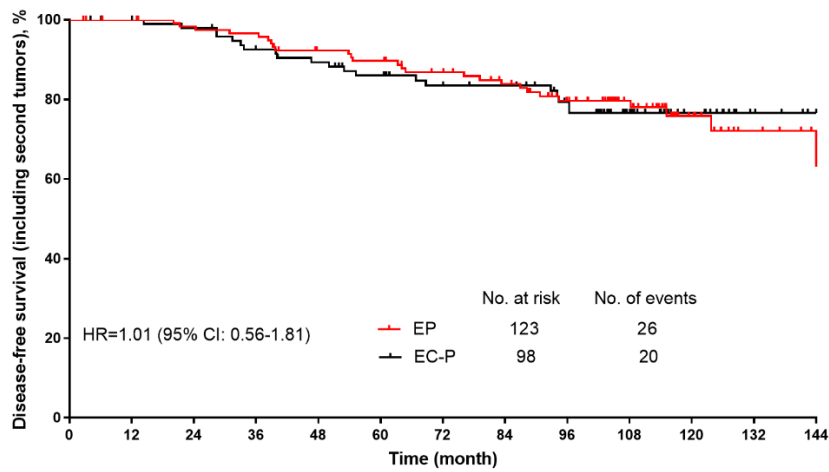

| No. at risk (No. of events) | 0   | 12  | 24  | 36  | 48  | 60  | 72  | 84 | 96 | 108 | 120 | 132 | 144 |
|-----------------------------|-----|-----|-----|-----|-----|-----|-----|----|----|-----|-----|-----|-----|
| EP                          | 123 | 140 | 136 | 129 | 118 | 115 | 101 | 94 | 78 | 58  | 31  | 19  | 13  |
| EC-P                        | 98  | 123 | 120 | 110 | 103 | 95  | 79  | 75 | 65 | 45  | 28  | 17  | 8   |

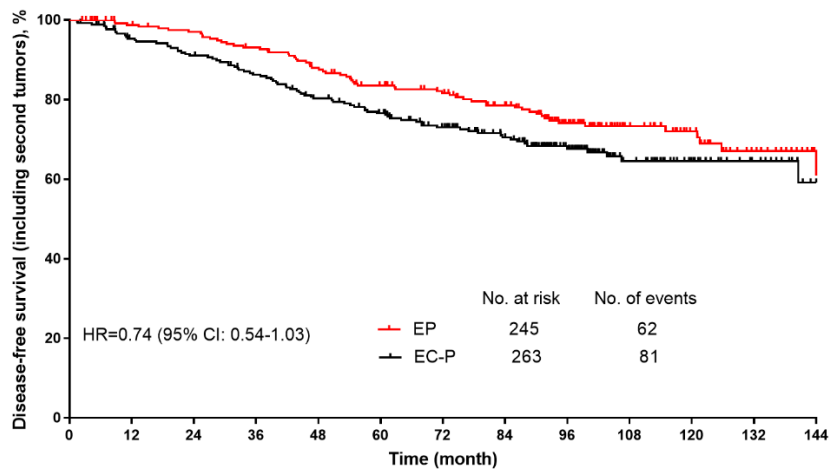

| No. at risk (No. of events) | 0   | 12  | 24  | 36  | 48  | 60  | 72  | 84  | 96  | 108 | 120 | 132 | 144 |
|-----------------------------|-----|-----|-----|-----|-----|-----|-----|-----|-----|-----|-----|-----|-----|
| EP                          | 245 | 233 | 227 | 217 | 203 | 188 | 166 | 151 | 113 | 67  | 49  | 30  | 11  |
| EC-P                        | 263 | 243 | 232 | 217 | 200 | 186 | 160 | 135 | 94  | 55  | 37  | 24  | 9   |

**eTable 1.** The Comparison of Disease-Free Survival Between the 2 Groups

|                        | EP (n=407) | EC-P (n=406) |
|------------------------|------------|--------------|
| Patients with an event | 89 (21.9)  | 100 (24.6)   |
| Breast cancer relapse  | 82 (20.1)  | 95 (23.4)    |
| Local recurrence       | 8 (2.0)    | 10 (2.5)     |
| Regional recurrence    | 17 (4.2)   | 29 (7.1)     |
| Distant recurrence     | 64 (15.7)  | 74 (18.2)    |
| Bone                   | 34 (8.4)   | 47 (11.6)    |
| Lung                   | 22 (5.4)   | 27 (6.7)     |
| Liver                  | 20 (4.9)   | 26 (6.4)     |
| Brain                  | 2 (0.5)    | 2 (0.5)      |
| Other                  | 6 (1.5)    | 5 (1.2)      |
| Death                  | 7 (1.7)    | 5 (1.2)      |

**eTable 2.** Subgroup Analysis

|                         | DFS |        |      |        |                  |         | OS  |        |      |        |                   |         |
|-------------------------|-----|--------|------|--------|------------------|---------|-----|--------|------|--------|-------------------|---------|
|                         | EP  |        | EC-P |        | HR<br>(95% CI)   | P value | EP  |        | EC-P |        | HR<br>(95% CI)    | P value |
|                         | No. | Events | No.  | Events |                  |         | No. | Events | No.  | Events |                   |         |
| Age                     |     |        |      |        |                  |         |     |        |      |        |                   |         |
| <55 years               | 287 | 65     | 294  | 68     | 0.93 (0.66-1.30) | 0.652   | 287 | 24     | 294  | 28     | 1.15 (0.66-1.96)  | 0.629   |
| ≥55 years               | 120 | 24     | 112  | 32     | 0.60 (0.35-1.02) | 0.059   | 120 | 11     | 112  | 14     | 0.62 (0.28-1.37)  | 0.235   |
| Menopausal status       |     |        |      |        |                  |         |     |        |      |        |                   |         |
| Premenopausal           | 243 | 56     | 241  | 50     | 1.05 (0.72-1.54) | 0.775   | 243 | 24     | 241  | 17     | 1.32 (0.71-2.44)  | 0.373   |
| Postmenopausal          | 164 | 33     | 165  | 50     | 0.59 (0.38-0.91) | 0.017   | 164 | 15     | 165  | 21     | 0.66 (0.34-1.27)  | 0.214   |
| TNM stage               |     |        |      |        |                  |         |     |        |      |        |                   |         |
| Stage2                  | 217 | 31     | 213  | 30     | 0.93 (0.56-1.54) | 0.774   | 217 | 10     | 213  | 7      | 1.27 (0.49-3.33)  | 0.622   |
| Stage3                  | 190 | 58     | 193  | 70     | 0.78 (0.55-1.10) | 0.155   | 190 | 29     | 193  | 31     | 0.91 (0.55-1.52)  | 0.719   |
| Ki67                    |     |        |      |        |                  |         |     |        |      |        |                   |         |
| ≤30%                    | 303 | 57     | 284  | 67     | 0.72 (0.51-1.03) | 0.076   | 303 | 24     | 284  | 23     | 0.90 (0.51-1.59)  | 0.715   |
| >30%                    | 65  | 15     | 77   | 23     | 0.76 (0.40-1.45) | 0.408   | 65  | 7      | 77   | 12     | 0.72 (0.29-1.79)  | 0.490   |
| Lymphovascular invasion |     |        |      |        |                  |         |     |        |      |        |                   |         |
| Yes                     | 117 | 32     | 126  | 33     | 1.03 (0.63-1.67) | 0.902   | 117 | 17     | 126  | 16     | 1.14 (0.57-2.22)  | 0.725   |
| No                      | 290 | 57     | 280  | 67     | 0.74 (0.52-1.05) | 0.099   | 290 | 22     | 280  | 22     | 0.89 (0.49-1.61)  | 0.700   |
| Endocrinotherapy        |     |        |      |        |                  |         |     |        |      |        |                   |         |
| Yes                     | 394 | 86     | 393  | 97     | 0.82 (0.61-1.09) | 0.172   | 394 | 38     | 393  | 37     | 0.95 (0.61-1.49)  | 0.835   |
| No                      | 13  | 3      | 13   | 3      | 1.10 (0.22-5.56) | 0.908   | 13  | 1      | 13   | 1      | 1.09 (0.07-16.67) | 0.953   |
| Radiotherapy            |     |        |      |        |                  |         |     |        |      |        |                   |         |
| Yes                     | 257 | 68     | 258  | 65     | 0.98 (0.69-1.37) | 0.894   | 257 | 30     | 258  | 26     | 1.06 (0.63-1.82)  | 0.808   |
| No                      | 150 | 21     | 148  | 35     | 0.55 (0.32-0.93) | 0.024   | 150 | 9      | 148  | 12     | 0.72 (0.31-1.69)  | 0.462   |

DFS, disease-free survival; OS, overall survival; HR, hazard ratio; CI, confidence interval.

**eTable 3.** The Comparison of Chemical Menopause Events Between the 2 Groups

|     | EP (n=135) <sup>a</sup> | EC-P (n=114) <sup>a</sup> |
|-----|-------------------------|---------------------------|
| CIA | 61 (45.2)               | 59 (51.8)                 |

<sup>a</sup> Those who were postmenopausal, or with irregular menstruation, or received ovarian function inhibitors were excluded from the analysis. CIA, chemotherapy-induced amenorrhea, which was defined as amenorrhea for more than 12 months during the chemotherapy or within 1 year after the chemotherapy.
