# Supplementary material for: Effect of Epirubicin Plus Paclitaxel vs Epirubicin and Cyclophosphamide Followed by Paclitaxel on Disease-Free Survival Among Patients With Operable ERBB2-Negative and Lymph Node–Positive Breast Cancer: A Randomized Clinical Trial
Source: PubMed Central journal article supplement (PMC9958529; doi:10.1001/jamanetworkopen.2023.0122), 2023-02-24
Supplement: jamanetwopen-e230122-s003.pdf [file jamanetwopen-e230122-s003.pdf]

## Data Sharing Statement

Yuan. Effect of Epirubicin Plus Paclitaxel vs Epirubicin and Cyclophosphamide Followed by Paclitaxel on Disease-Free Survival Among Patients With Operable ERBB2-Negative and Lymph Node-Positive Breast Cancer. *JAMA Netw Open*. Published February 24, 2023.  
doi:10.1001/jamanetworkopen.2023.0122

### Data

**Data available:** No
